# Supplementary material
Source: PubMed Central journal article supplement (PMC11415268)
Supplement: NIHMS1971705-supplement-1.pdf [file NIHMS1971705-supplement-1.pdf]

## APPENDIX A. SUPPLEMENTARY INFORMATION ON SPATIAL PATTERN ANALYSIS

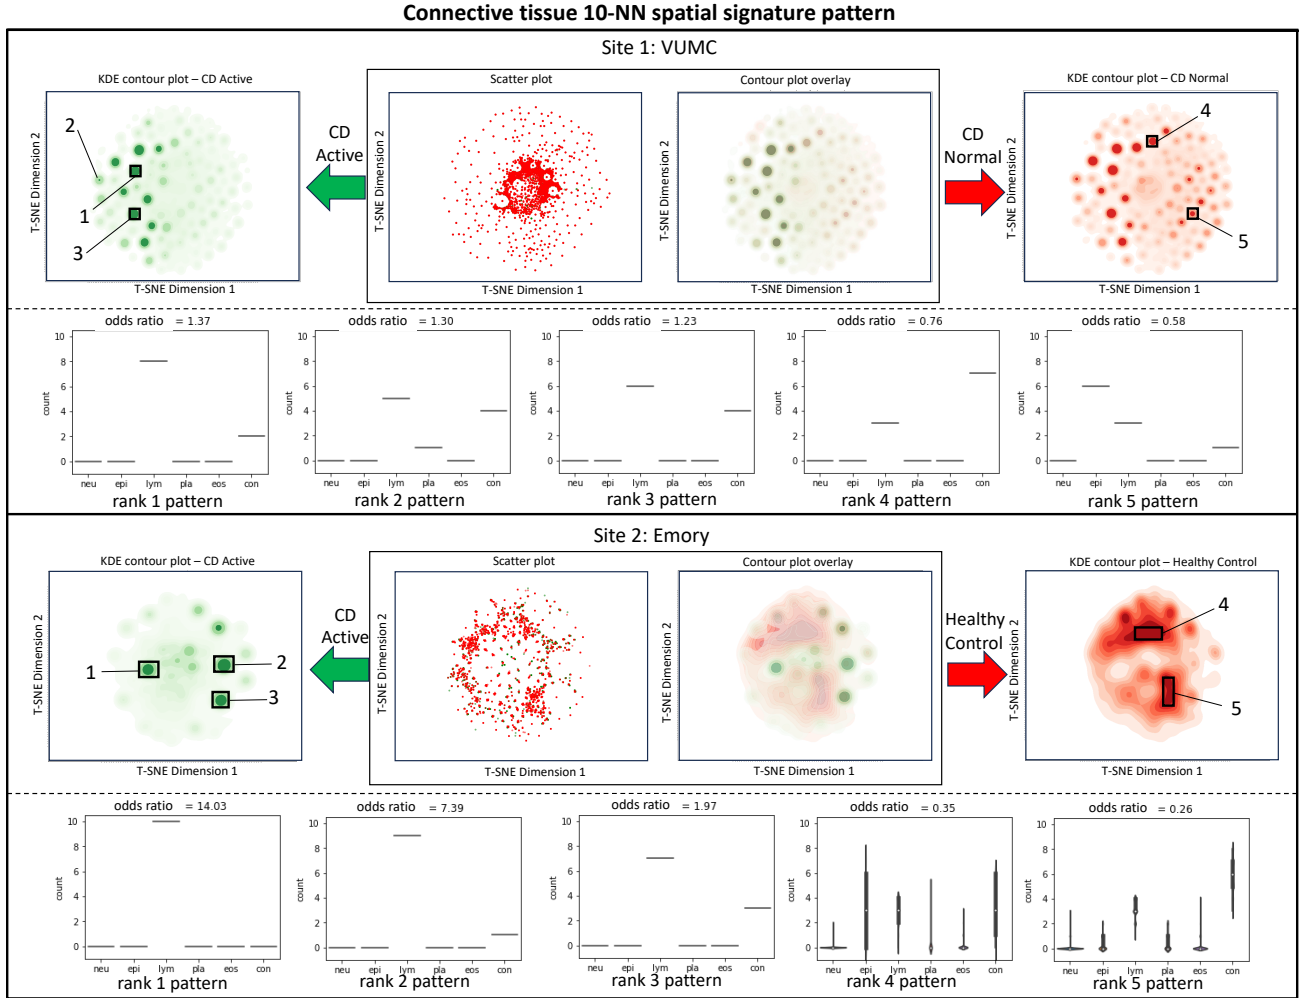

Figure 6: Visualization and quantification of connective tissue surrounding a 10-NN shape pattern recognition.

Plasma cell 10-NN spatial signature pattern

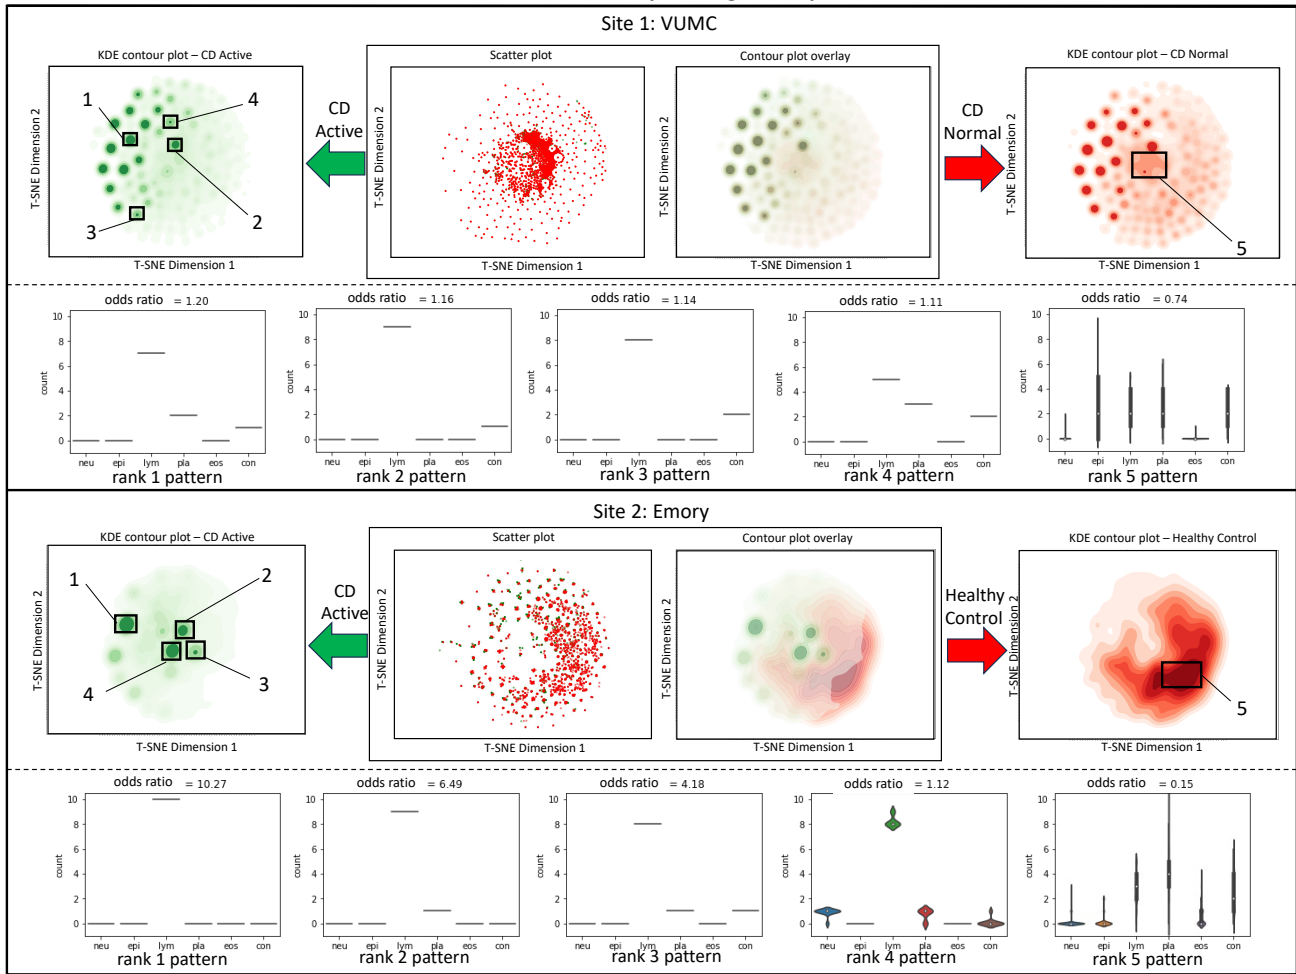

Figure 7: Visualization and quantification of plasma cells surrounding a 10-NN shape pattern recognition.

### Lymphocytes 10-NN spatial signature pattern

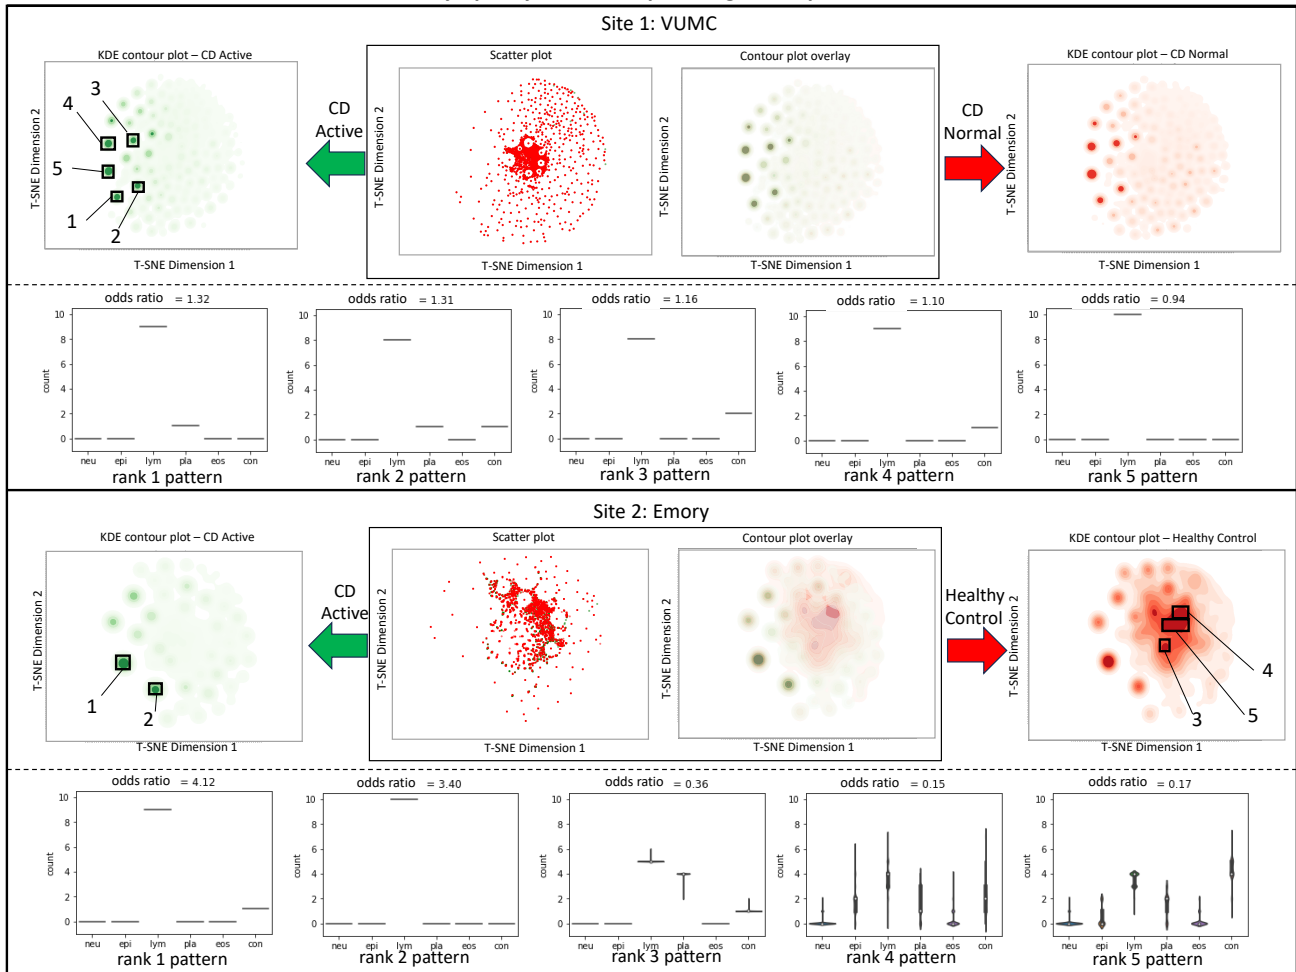

Figure 8: Visualization and quantification of lymphocytes surrounding a 10-NN shape pattern recognition.

### Epithelial cell 10-NN spatial signature pattern

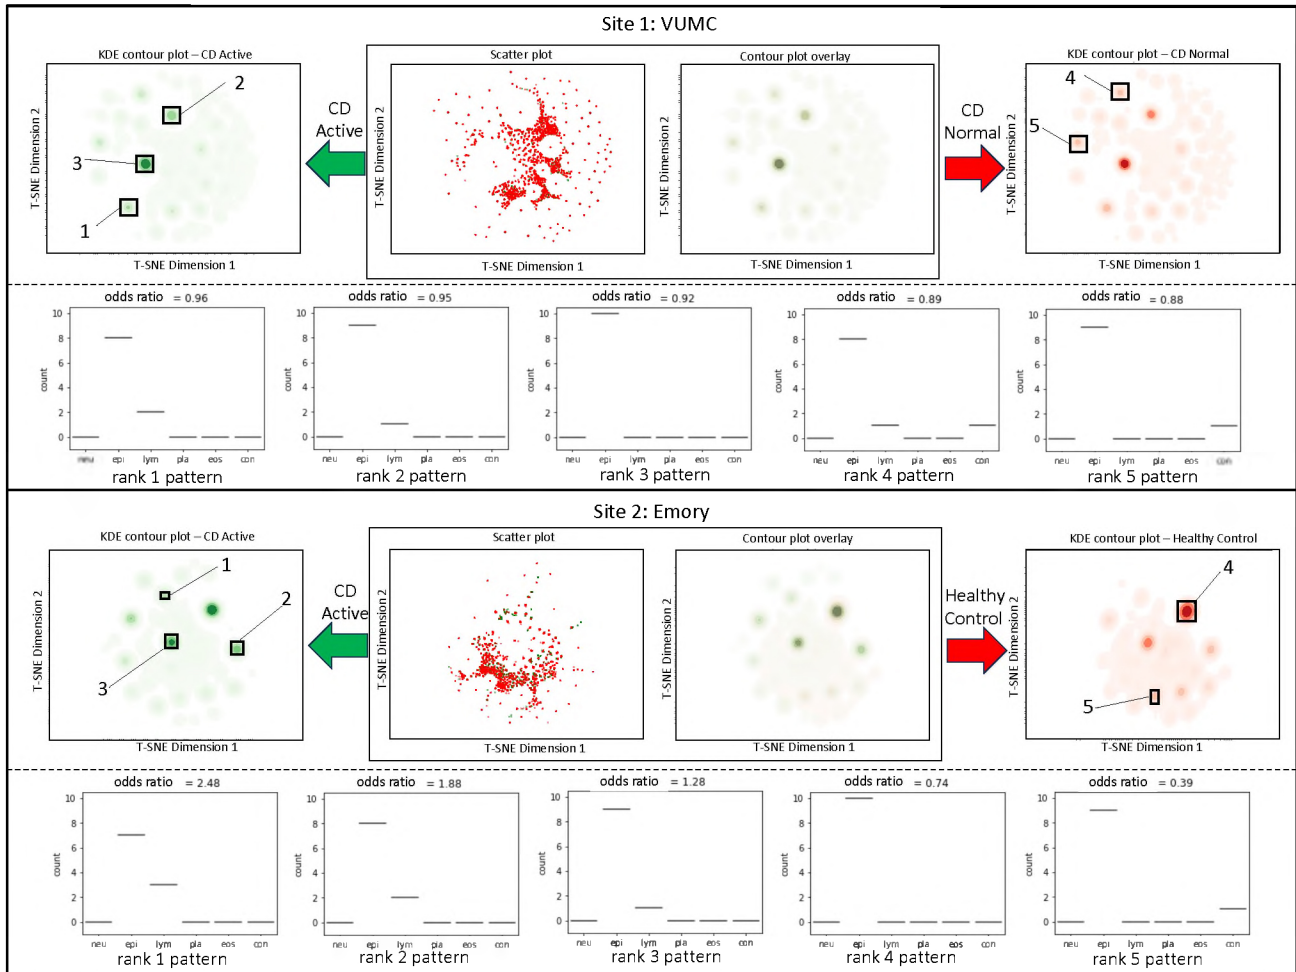

Figure 9: Visualization and quantification of epithelial cells surrounding a 10-NN shape pattern recognition.
